# Supplementary material for: Denitrification Characteristics of the Low-Temperature Tolerant Denitrification Strain <em>Achromobacter spiritinus</em> HS2 and Its Application
Source: Preprints.org preprint supplement (doi:10.20944/preprints202402.0405.v1), 2024-02-07
Supplement: Supplementary file 1 [file supplementary]

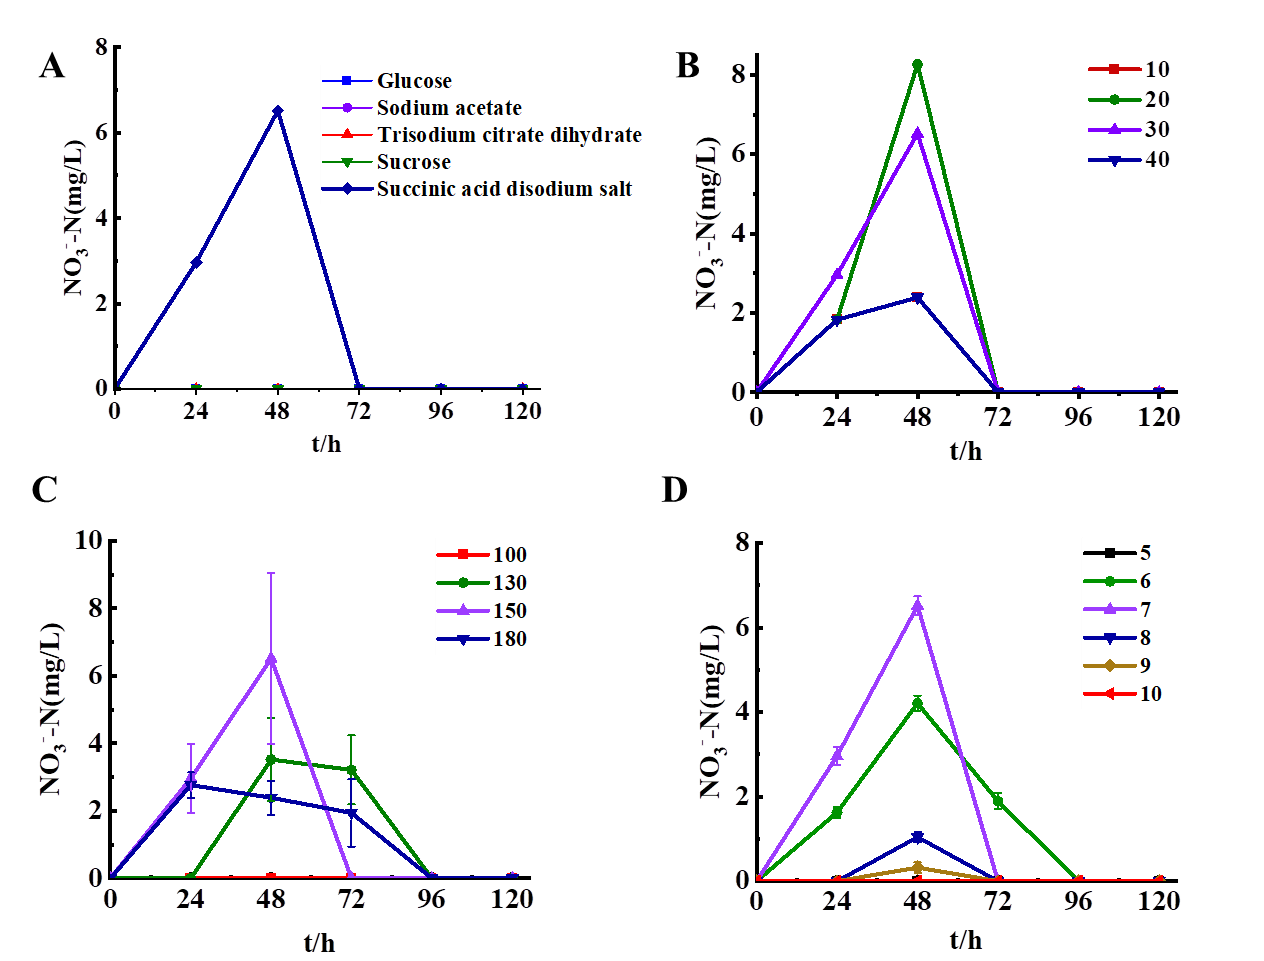


Figure S1 nitrate accumulation of strain HS2 under various factors (A: Carbon source, B: Carbon-to-nitrogen ratio, C: Dissolved oxygen, D: pH)


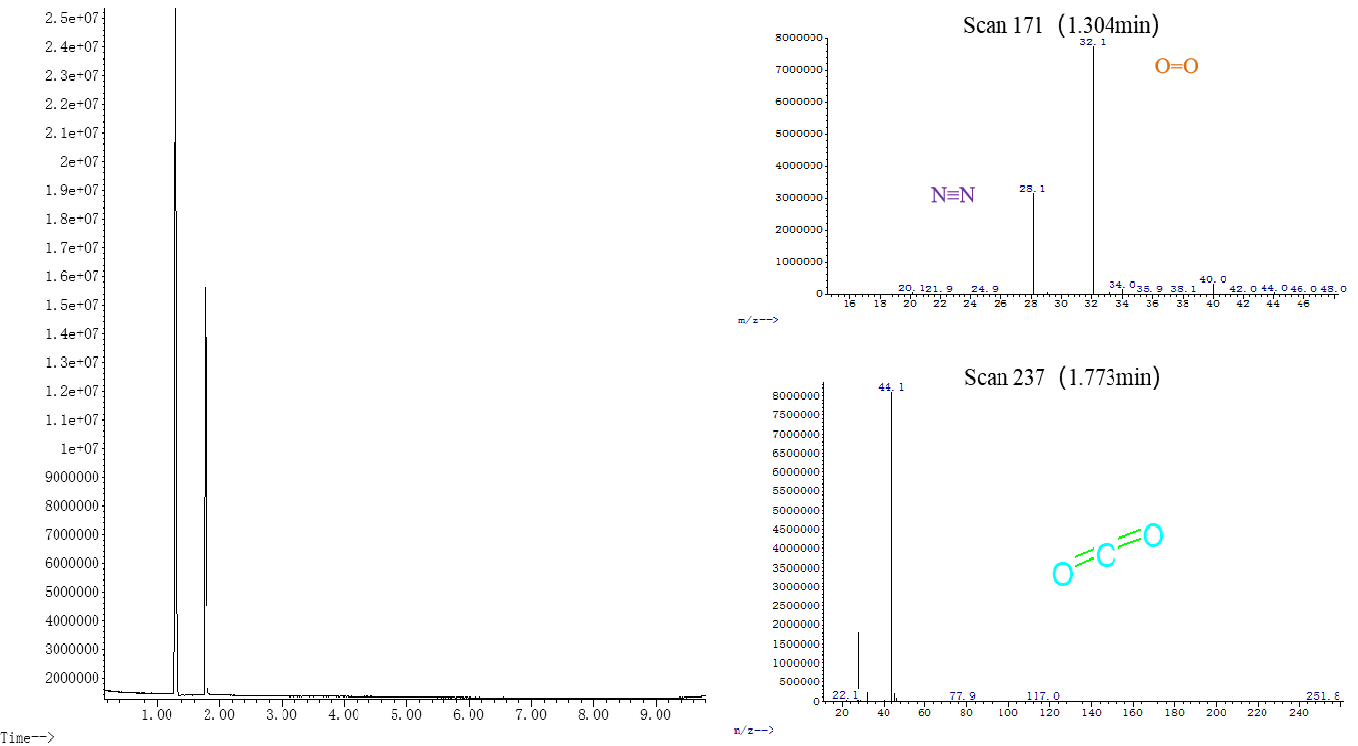


Figure S2 Gas products of strain HS2 in HN-AD
